# Supplementary material
Source: HighWire-hosted journal article supplement (https://cmaj.ca/highwire/filestream/77685/field_highwire_adjunct_files/1/202065-res-2-at.pdf)
Supplement: 202065-res-2-at.pdf [file 202065-res-2-at.pdf]

## Appendix 2 (as submitted by the authors): Table S1

Multivariate analysis of likelihood ratios using the Spiegelhalter & Knill-Jones method

| Symptom            | Adjusted PLR                | Adjusted NLR             |
|--------------------|-----------------------------|--------------------------|
| Anosmia or ageusia | 6.25 (3.66, 34.43)          | 0.94 (0.92, 0.95)        |
| Nausea/vomiting    | 4.86 (2.35, 18.78)          | 0.97 (0.96, 0.98)        |
| Headache           | 2.17 (1.79, 3.81)           | 0.91 (0.87, 0.93)        |
| <b>All factors</b> | <b>65.92 (49.48, 91.92)</b> | <b>0.83 (0.81, 0.86)</b> |

PLR = positive likelihood ratio; NLR = negative likelihood ratio
